# Supplementary material
Source: publisher site journal article supplement (https://www.spandidos-publications.com/3095/downloadSupplementary)

Figure S1. The Cancer Genome Atlas database analysis of the association between USP30-AS1/miR-299-3p/PTP4A1 and clinicopathological features in CESC. (A) Association between USP30-AS1 expression and tumour stage in CESC. (B) Association between USP30-AS1 expression and tumour grade in CESC. (C) Association between miR-299-3p expression and tumour stage in CESC. (D) Association between miR-299-3p expression and tumour grade in CESC. (E) Association between miR-299-3p expression and lymph node metastasis in CESC. (F) Association between high and low PTP4A1 expression and overall survival in CESC. \* $P < 0.05$  and \*\* $P < 0.01$ . miR, microRNA; CESC, cervical squamous cell carcinoma and endocervical adenocarcinoma; N, Node.

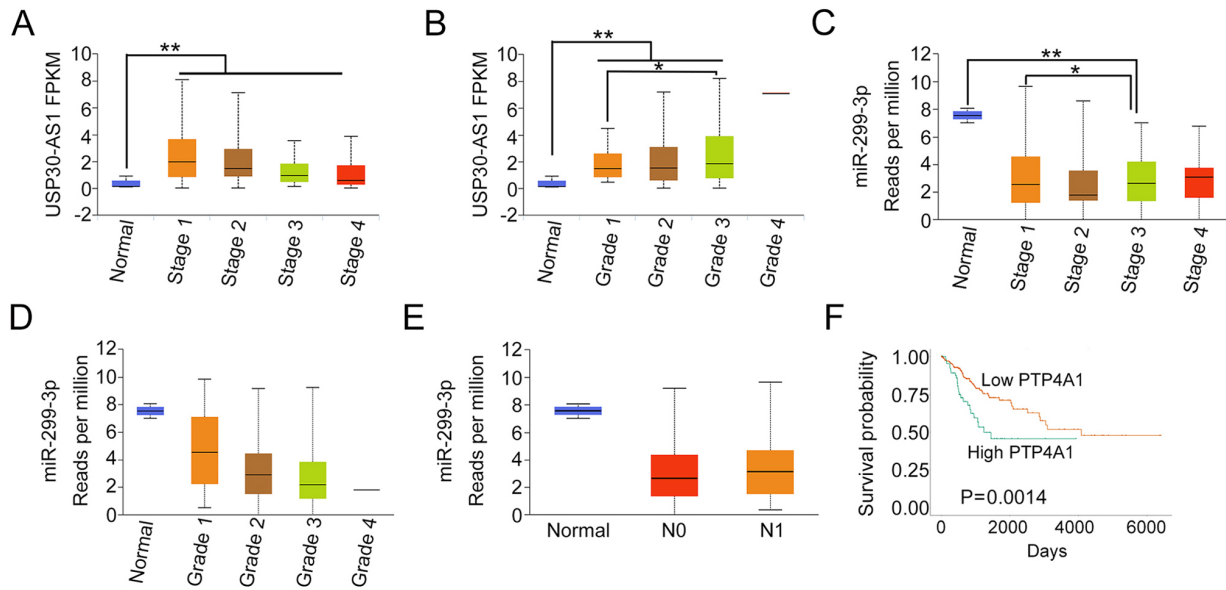

Supplement: Supplementary file 1 [file downloadSupplementary]
